# Supplementary material
Source: PubMed Central journal article supplement (PMC3635123)

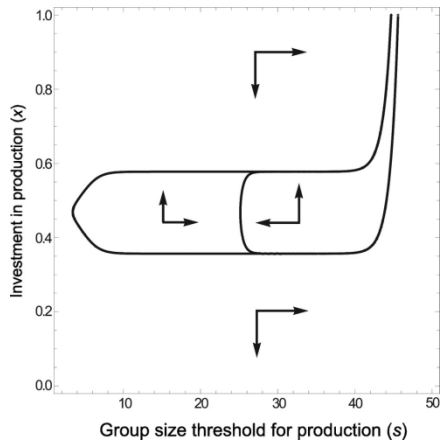

Figure 5

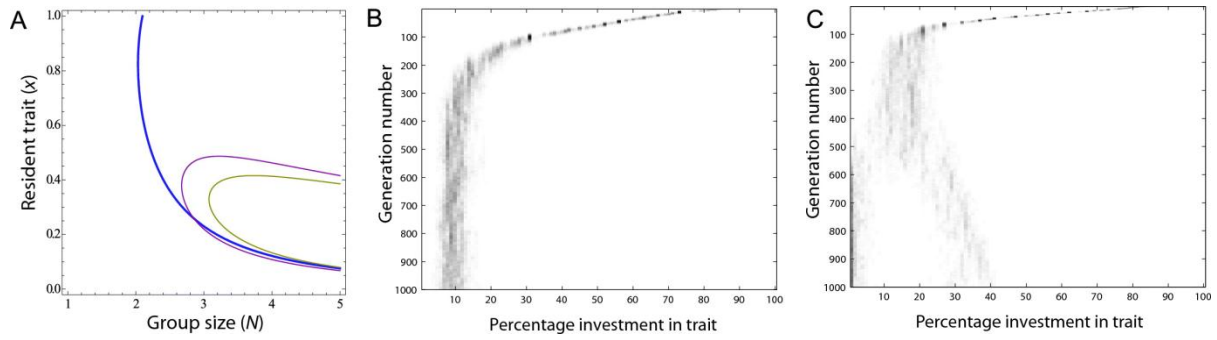

Figure A1

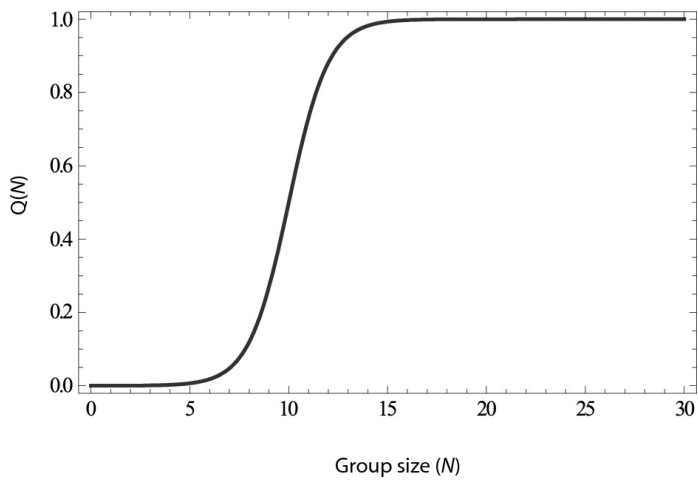

Figure A2

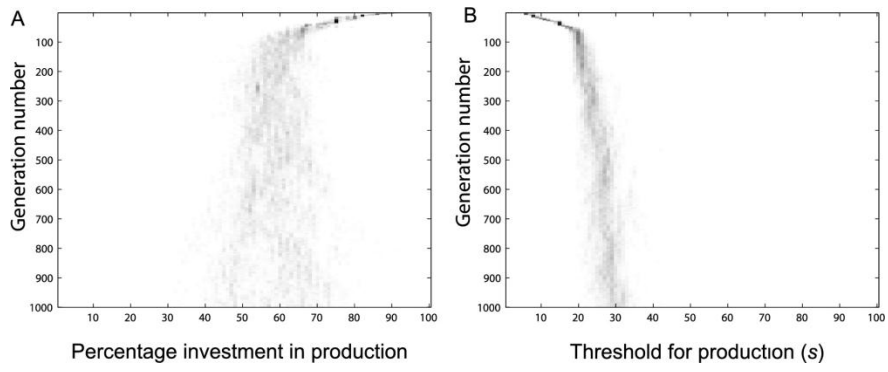

Figure A3

Supplement: NIHMS51999-supplement-01.pdf [file NIHMS51999-supplement-01.pdf]
